# Supplementary material
Source: PubMed Central journal article supplement (PMC3139970)
Supplement: supp_kwq209_kwq209_Web_Material.pdf [file supp_kwq209_kwq209_Web_Material.pdf]

**Web Table 1.** Countries of Birth Included in non-Hispanic Caribbean Immigrant Groups: New York City Birth Records, 1995-2003.

| <b>African Country</b>         | <b>N</b> | <b>African Country</b> | <b>N</b> | <b>Non-Hispanic Caribbean Country</b> | <b>N</b> |
|--------------------------------|----------|------------------------|----------|---------------------------------------|----------|
| Algeria                        | 25       | Madagascar             | 10       | Anguilla                              | 0        |
| Angola                         | 37       | Malawi                 | 1        | Antigua and Barbuda                   | 1,953    |
| Benin                          | 77       | Mali                   | 1,324    | Aruba                                 | 54       |
| Botswana                       | 0        | Mauritania             | 100      | Bahamas                               | 288      |
| Burundi                        | 28       | Mauritius              | 6        | Barbados                              | 3,173    |
| Burkina Faso                   | 121      | Morocco                | 123      | Bonaire                               | 0        |
| Cameroon                       | 165      | Mozambique             | 3        | Cayman Islands                        | 28       |
| Cape Verde Islands             | 15       | Namibia                | 11       | Curacao                               | 35       |
| Central African Republic       | 13       | Niger                  | 263      | Dominica                              | 574      |
| Chad                           | 21       | Nigeria                | 4,714    | Grenada                               | 3,305    |
| Comoro Islands                 | 3        | Rwanda                 | 8        | Guadalupe                             | 14       |
| Congo (or Zaire)               | 180      | Sao Tome and Principe  | 1,804    | Haiti                                 | 16,000   |
| Cote d'Ivoire (or Ivory Coast) | 1,359    | Senegal                | 0        | Jamaica                               | 29,818   |
| Djiboute                       | 0        | Seychelles             | 0        | Martinique                            | 28       |
| Egypt                          | 107      | Sierra Leone           | 391      | Montserrat                            | 173      |
| Equatorial Guinea              | 1        | Somalia                | 54       | Nevis                                 | 722      |
| Eritrea                        | 261      | South Africa           | 81       | St. Bartholemy                        | 0        |
| Ethiopia                       |          | Sudan                  | 265      | St. Kitts                             | 5        |
| Gabon                          | 34       | Swaziland              | 1        | St. Lucia                             | 1,515    |
| Gambia                         | 1,570    | Tanzania               | 43       | St. Maartin                           | 39       |
| Ghana                          | 4,111    | Togo                   | 228      | St. Martin                            | 54       |
| Guinea-Bissau                  | 8        | Tunisia                | 13       | St. Vincent and Grenada               | 2,331    |
| Guinea                         | 2,000    | Uganda                 | 44       | Tortola                               | 46       |
| Kenya                          | 58       | Zambia                 | 40       | Trinidad                              | 13,197   |
| Lesotho                        | 3        | Zimbabwe (or Rhodesia) | 48       | Turks and Caicos                      | 25       |
| Libya                          | 2        | Other African          | 448      | Virgin Islands                        | 1,311    |
| Liberia                        | 866      |                        |          | West Indies                           | 30       |

**Web Table 2.** Census Tract-Level Variables Used in Computation of the Neighborhood Deprivation Index. Data Downloaded from Summary File 3 of the 2000 US Census

| <b>Analysis Variable<br/>(tract-level)</b> | <b>Census Variable(s)</b>                                                                                                                                                      | <b>Census Variable<br/>Number(s)</b>                      |
|--------------------------------------------|--------------------------------------------------------------------------------------------------------------------------------------------------------------------------------|-----------------------------------------------------------|
| Percent with < high school education       | Total population aged 25+<br>Males: no schooling, ..., 12th grade, no diploma<br>Females: no schooling, ..., 12th grade, no diploma                                            | P037001<br>P037003, ..., P037010<br>P037020, ..., P037027 |
| Percent males not in the labor force       | Total population, males aged 16+<br>Males aged 16+ not in labor force                                                                                                          | P043002<br>P043008                                        |
| Percent unemployed                         | Total male civilian population aged 16+ in labor force<br>Total female civilian population aged 16+ in labor force<br>Males aged 16+ unemployed<br>Females aged 16+ unemployed | P043005<br>P043012<br>P043007<br>P043014                  |
| Percent renter-occupied households         | Total number of occupied housing units<br>Renter occupied housing units                                                                                                        | H007001<br>H007003                                        |
| Percent crowding (>1 person/room)          | Total number of occupied housing units<br>Owner occupied: 1.01, ..., 2.01+ occupants per room<br>Renter occupied: 1.01, ..., 2.01+ occupants per room                          | H020001<br>H020005, ..., H020007<br>H020011, ..., H020013 |
| Percent below poverty level                | Total population for whom poverty status is determined<br>Individuals with income below poverty level in 1999                                                                  | P087001<br>P087002                                        |
| Percent female-headed families             | Total number of family households<br>Female headed family households, children aged <18                                                                                        | P010006<br>P010015                                        |
| Percent income <\$30,000 per year          | Total number of households<br><\$10,000 per year, ..., \$29,999 per year                                                                                                       | P052001<br>P052002, ..., P052006                          |
| Percent on public assistance               | Total number of households<br>Households on public assistance                                                                                                                  | P064001<br>P064002                                        |
| Percent no vehicle                         | Total number of occupied housing units<br>Owner-occupied with no vehicle available<br>Renter-occupied with no vehicle available                                                | H044001<br>H044003<br>H044010                             |
| Percent males in profession                | Total employed civilian males aged 16+<br>Males aged 16+ in professional occupations                                                                                           | P050002<br>P050010                                        |
| Percent females in profession              | Total employed civilian females aged 16+<br>Females aged 16+ in professional occupations                                                                                       | P050049<br>P050057                                        |
| Percent males in management                | Total employed civilian males aged 16+<br>Males aged 16+ in management occupations                                                                                             | P050002<br>P050004                                        |
| Percent females in management              | Total employed civilian females aged 16+<br>Females aged 16+ in management occupations                                                                                         | P050049<br>P050051                                        |

**Web Table 2, continued.** Census Tract-Level Variables Used in Computation of the Neighborhood Deprivation Index. Data Downloaded from Summary File 3 of the 2000 US Census

| <b>Analysis Variable<br/>(tract-level)</b> | <b>Census Variable(s)</b>                              | <b>Census Variable<br/>Number(s)</b> |
|--------------------------------------------|--------------------------------------------------------|--------------------------------------|
| Median household income                    | Median household income in 1999                        | P053001                              |
|                                            | Total number of households                             | P010001                              |
| Median individual income                   | Median earnings for individuals aged 16+ with earnings | P085001                              |
|                                            | Total number of individuals aged 16+ with earnings     | P084001                              |
| Median value of housing units              | Median value of owner-occupied housing units           | H085001                              |
|                                            | Total number of owner-occupied housing units           | H084001                              |
|                                            | Population aged 5+ in same house since 1995            | PCT021002                            |

**Web Table 3.** Fully Adjusted Preterm Birth Risk Differences for African-, Caribbean-, and US-born Non-Hispanic Black Women Associated With Neighborhoods in the 90<sup>th</sup> Percentile of Ethnic/Immigrant Density Compared to 10<sup>th</sup> Percentile Neighborhoods: New York City, 1995-2003.

| Immigrant/Ethnic Group | Model                       |             |                                         |             |                                         |              |
|------------------------|-----------------------------|-------------|-----------------------------------------|-------------|-----------------------------------------|--------------|
|                        | Fully Adjusted <sup>a</sup> |             | Stratified: Less deprived neighborhoods |             | Stratified: More deprived neighborhoods |              |
|                        | RD <sup>b</sup>             | (95% CI)    | RD <sup>b</sup>                         | (95% CI)    | RD <sup>b</sup>                         | (95% CI)     |
| African-born           | 5.9                         | (3.3, 8.5)  | 3.8                                     | (-1.1, 8.7) | 7.0                                     | (3.0, 11.0)  |
| Caribbean-born         | 1.6                         | (-3.3, 6.4) | -1.1                                    | (-8.4, 6.1) | 3.9                                     | (-2.2, 10.1) |
| US-born                | 9.8                         | (4.8, 14.7) | -0.2                                    | (-8.4, 8.1) | 12.6                                    | (6.2, 19.0)  |

<sup>a</sup>Fully-adjusted models included pre-pregnancy weight in addition to other covariates

<sup>b</sup>Fully adjusted and stratified risk differences were calculated for women aged 20-34 who were high-school educated, had 2-5 previous live births, weighed between 125 and 150 pounds pre-pregnancy, were nonsmokers, were on Medicaid, and resided in a more stable neighborhood and (for adjusted estimates) poorer neighborhood

**Web Table 4.** Preterm Birth Risk Differences for African-, Caribbean-, and US-born Non-Hispanic Black Women Associated With Neighborhoods in the 90<sup>th</sup> Percentile of Ethnic/Immigrant Density Compared to 10<sup>th</sup> Percentile Neighborhoods Using Alternative Model and Variable Specifications: New York City, 1995-2003.

| Analysis &<br>Ethnic/Immigrant Group  | Model           |              |                                               |              |                                               |              |
|---------------------------------------|-----------------|--------------|-----------------------------------------------|--------------|-----------------------------------------------|--------------|
|                                       | Adjusted        |              | Stratified: Less<br>deprived<br>neighborhoods |              | Stratified: More<br>deprived<br>neighborhoods |              |
|                                       | RD <sup>a</sup> | (95% CI)     | RD <sup>a</sup>                               | (95% CI)     | RD <sup>a</sup>                               | (95% CI)     |
| Controlling for US-born Black Density |                 |              |                                               |              |                                               |              |
| African-born                          | 2.8             | (0.0, 5.6)   | 1.4                                           | (-3.9, 6.7)  | 3.3                                           | (0.2, 6.5)   |
| Caribbean-born                        | 2.9             | (-3.8, 9.6)  | -2.3                                          | (-13.0, 8.4) | 5.8                                           | (-2.6, 14.2) |
| Primiparous Women Only                |                 |              |                                               |              |                                               |              |
| African-born                          | 3.3             | (-4.6, 11.1) | 12.1                                          | (-0.3, 24.6) | -1.4                                          | (-12.3, 9.5) |
| Caribbean-born                        | 8.7             | (0.3, 17.0)  | 6.2                                           | (-5.9, 18.2) | 11.2                                          | (0.3, 22.1)  |
| US-born                               | 10.1            | (2.9, 17.3)  | -3.4                                          | (-14.4, 7.6) | 15.4                                          | (6.0, 24.8)  |
| Spontaneous PTB                       |                 |              |                                               |              |                                               |              |
| African-born                          | 5.3             | (2.7, 7.8)   | 3.9                                           | (-0.8, 8.5)  | 6.1                                           | (2.8, 9.4)   |
| Caribbean-born                        | 1.7             | (-2.6, 6.0)  | 0.7                                           | (-5.3, 6.6)  | 2.6                                           | (-2.5, 7.7)  |
| US-born                               | 10.8            | (6.4, 15.2)  | -1.8                                          | (-10.0, 6.4) | 15.0                                          | (9.7, 20.4)  |
| Excluding Suppressed Tracts           |                 |              |                                               |              |                                               |              |
| African-born                          | 4.3             | (1.4, 7.1)   | 2.2                                           | (-2.6, 7.0)  | 5.8                                           | (1.9, 9.7)   |
| Caribbean-born                        | 1.7             | (-3.8, 7.1)  | -2.6                                          | (-10.9, 5.6) | 4.3                                           | (-1.9, 10.5) |
| US-born                               | 8.2             | (2.6, 13.8)  | -9.0                                          | (-18.7, 0.7) | 15.4                                          | (8.9, 21.9)  |
| Excluding South Americans             |                 |              |                                               |              |                                               |              |
| Caribbean-born                        | 3.3             | (-2.4, 9.0)  | 0.9                                           | (-6.9, 8.7)  | 4.9                                           | (-1.8, 11.6) |

<sup>a</sup> Adjusted and stratified risk differences were calculated for women aged 20-34 who were high school-educated, had 2-5 previous live births, were nonsmokers, were on Medicaid, and resided in a more stable neighborhood. Adjusted risk differences were calculated for poorer neighborhoods.

**Web Table 5.** Preterm Birth Risk Differences for Caribbean- and US-born Non-Hispanic Black Women Associated with Neighborhoods with 2% Own-Group Density Compared to Neighborhoods with 40% Own-Group Density

| Immigrant/Ethnic Group | Model           |           |                                         |           |                                         |            |
|------------------------|-----------------|-----------|-----------------------------------------|-----------|-----------------------------------------|------------|
|                        | Adjusted        |           | Stratified: Less deprived neighborhoods |           | Stratified: Less deprived neighborhoods |            |
|                        | RD <sup>a</sup> | 95% CI    | RD <sup>a</sup>                         | 95% CI    | RD <sup>a</sup>                         | 95% CI     |
| Caribbean <sup>b</sup> | 1.5             | -3.4, 6.3 | -1.6                                    | -8.9, 5.6 | 4.2                                     | -1.8, 10.3 |
| US-born                | 10.8            | 4.5, 17.1 | 10.2 <sup>c</sup>                       | 1.8, 18.5 | 12.9                                    | 4.1, 21.7  |

<sup>a</sup> Adjusted and stratified risk differences were calculated for women aged 20-34 who were high-school educated, had 2-5 previous live births, were nonsmokers, were on Medicaid, and resided in a more stable neighborhood and (for adjusted estimates) more deprived neighborhood

<sup>b</sup> A squared Caribbean density term was included in these models to mirror the squared black density term in US-born models and to ensure that group differences in results would not be attributable to different modeling strategies. Inclusion of the squared Caribbean density term did not change the model results, however.

<sup>c</sup> The risk difference associated with an increase from 2% to 40% US-born black density in less deprived neighborhoods is much higher than the risk difference in less deprived neighborhoods from in the main analysis (contrasting 13% to 70% US-born black density). This reflects the curvilinear relationship between US-born black density and US-born black preterm birth risks, which results in a steeper risk increase at the lower end of the ethnic density range, and which is most pronounced in less deprived neighborhoods.

**Web Table 6.** Preterm Birth Risk Differences for Country-Level Subgroups of African and Caribbean Non-Hispanic Black Immigrant Groups Associated With Neighborhoods in the 90<sup>th</sup> Percentile of Ethnic/Immigrant Density Compared to 10<sup>th</sup> Percentile Neighborhoods: New York City, 1995-2003.

| Ethnic/Immigrant<br>Group & Country<br>Sub-Groups | Model           |               |                                               |               |                                               |               |
|---------------------------------------------------|-----------------|---------------|-----------------------------------------------|---------------|-----------------------------------------------|---------------|
|                                                   | Adjusted        |               | Stratified: Less<br>deprived<br>neighborhoods |               | Stratified: More<br>deprived<br>neighborhoods |               |
|                                                   | RD <sup>a</sup> | (95% CI)      | RD <sup>a</sup>                               | (95% CI)      | RD <sup>a</sup>                               | (95% CI)      |
| African-born                                      |                 |               |                                               |               |                                               |               |
| Nigerian                                          | -2.4            | (-11.7, 7.0)  | -7.7                                          | (-20.3, 4.8)  | 0.0                                           | (-10.6, 10.6) |
| Ghanaian                                          | 5.0             | (-3.6, 13.6)  | -0.9                                          | (-6.8, 5.0)   | 15.7                                          | (4.5, 26.8)   |
| Caribbean-born                                    |                 |               |                                               |               |                                               |               |
| Jamaican                                          | 3.2             | (-5.9, 12.2)  | 0.9                                           | (-13.0, 14.7) | 5.0                                           | (-0.5, 16.6)  |
| Haitian                                           | 0.7             | (-11.8, 13.1) | -0.7                                          | (-17.2, 15.8) | 1.7                                           | (-16.0, 19.4) |

<sup>a</sup> Adjusted and stratified risk differences were calculated for women aged 20-34 who were high school-educated, had 2-5 previous live births, were nonsmokers, were on Medicaid, and resided in a more stable neighborhood. Adjusted risk differences were calculated for poorer neighborhoods.

**Web Figure 1a.** Distribution of births to African-born non-Hispanic black women in relation to non-Hispanic black African immigrant density: New York City, 1995-2003.

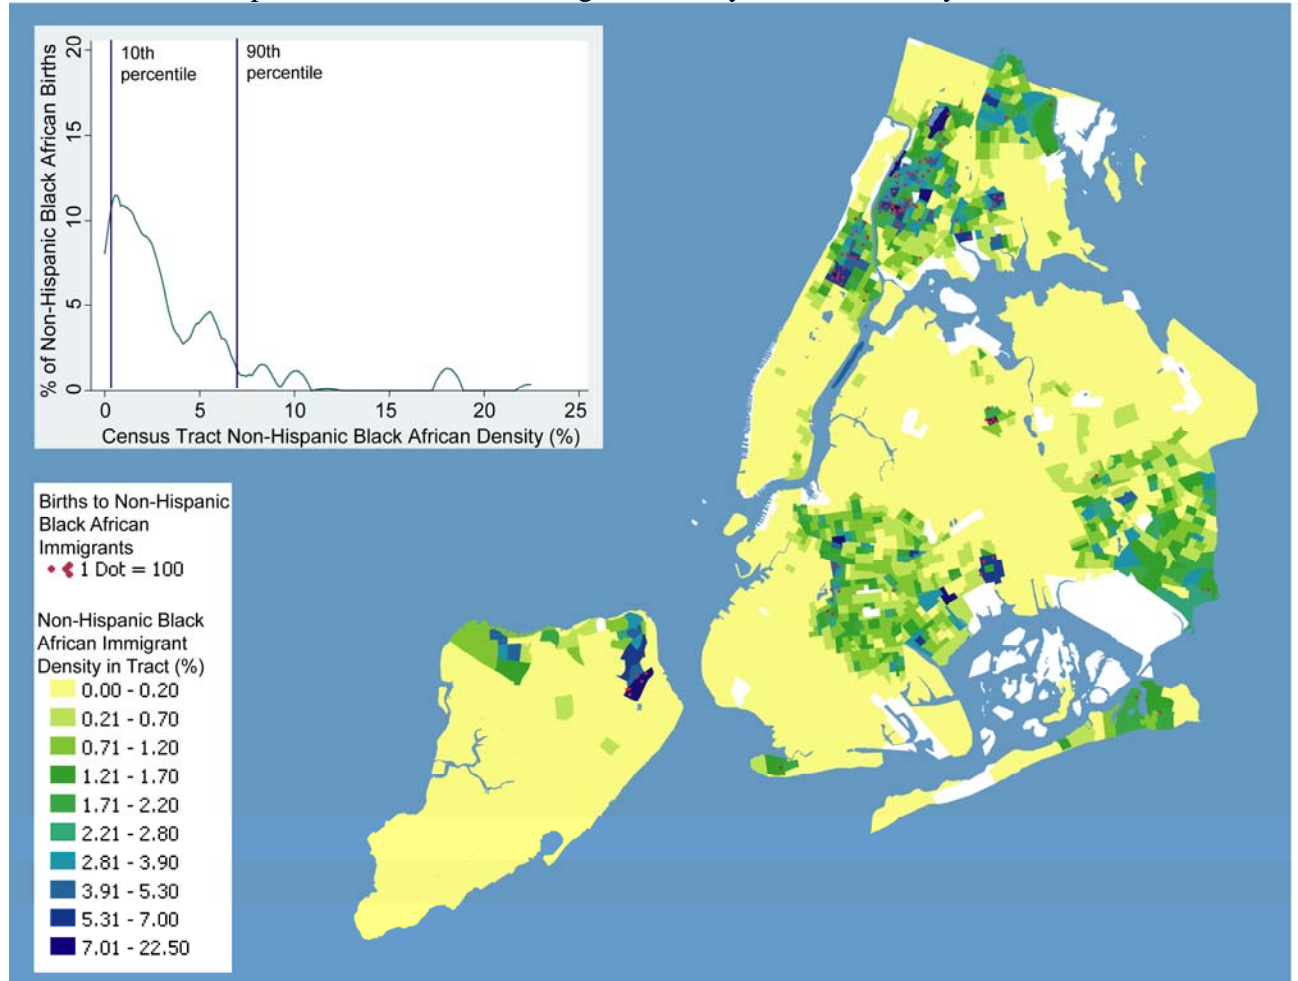

**Web Figure 1b.** Distribution of births to Caribbean-born non-Hispanic black women in relation to non-Hispanic black Caribbean immigrant density: New York City, 1995-2003.

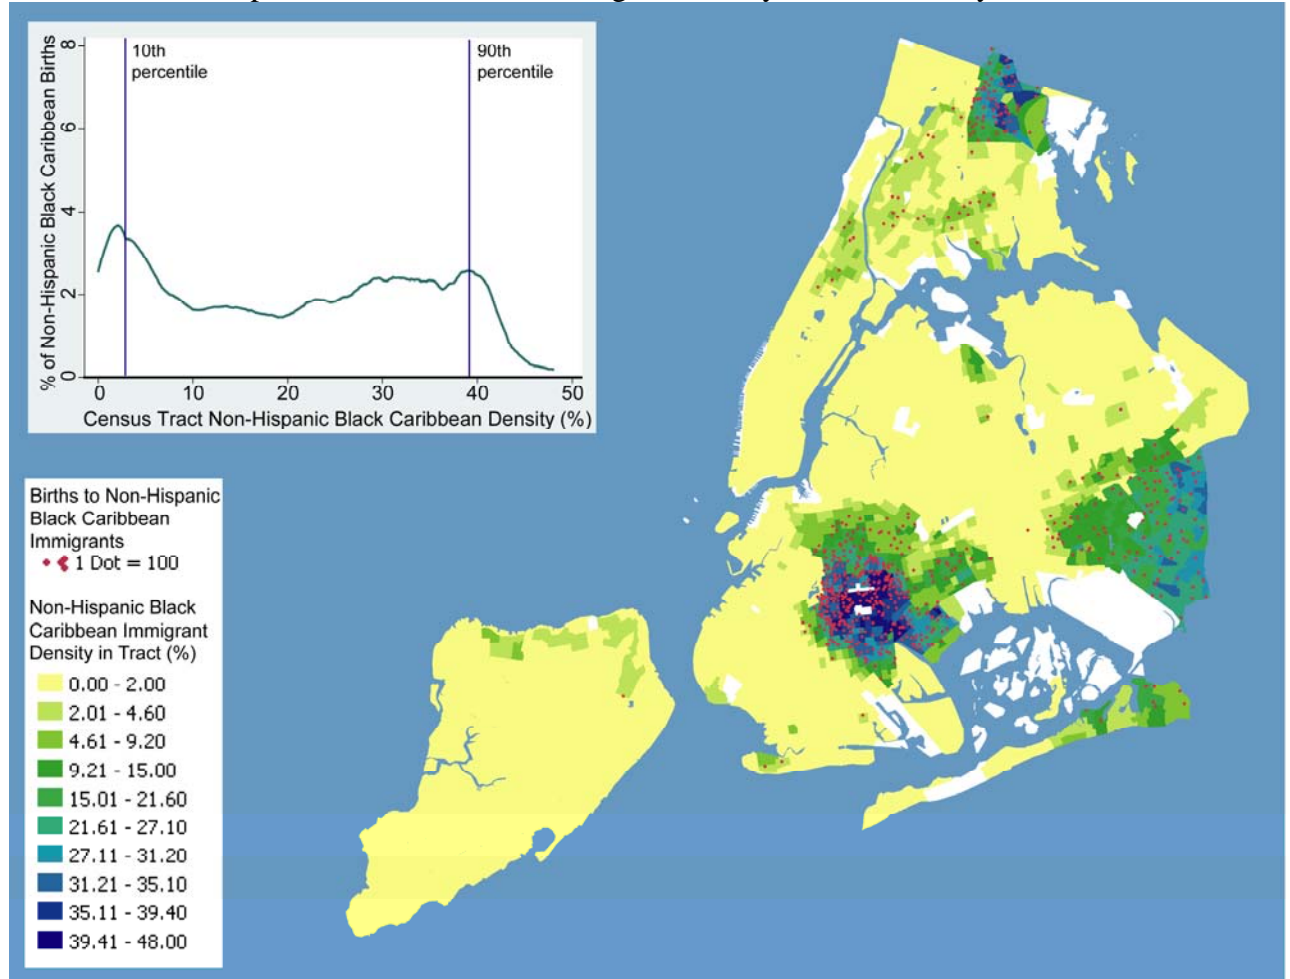

**Web Figure 1c.** Distribution of births to US-born non-Hispanic black women in relation to US-born non-Hispanic black density: New York City, 1995-2003

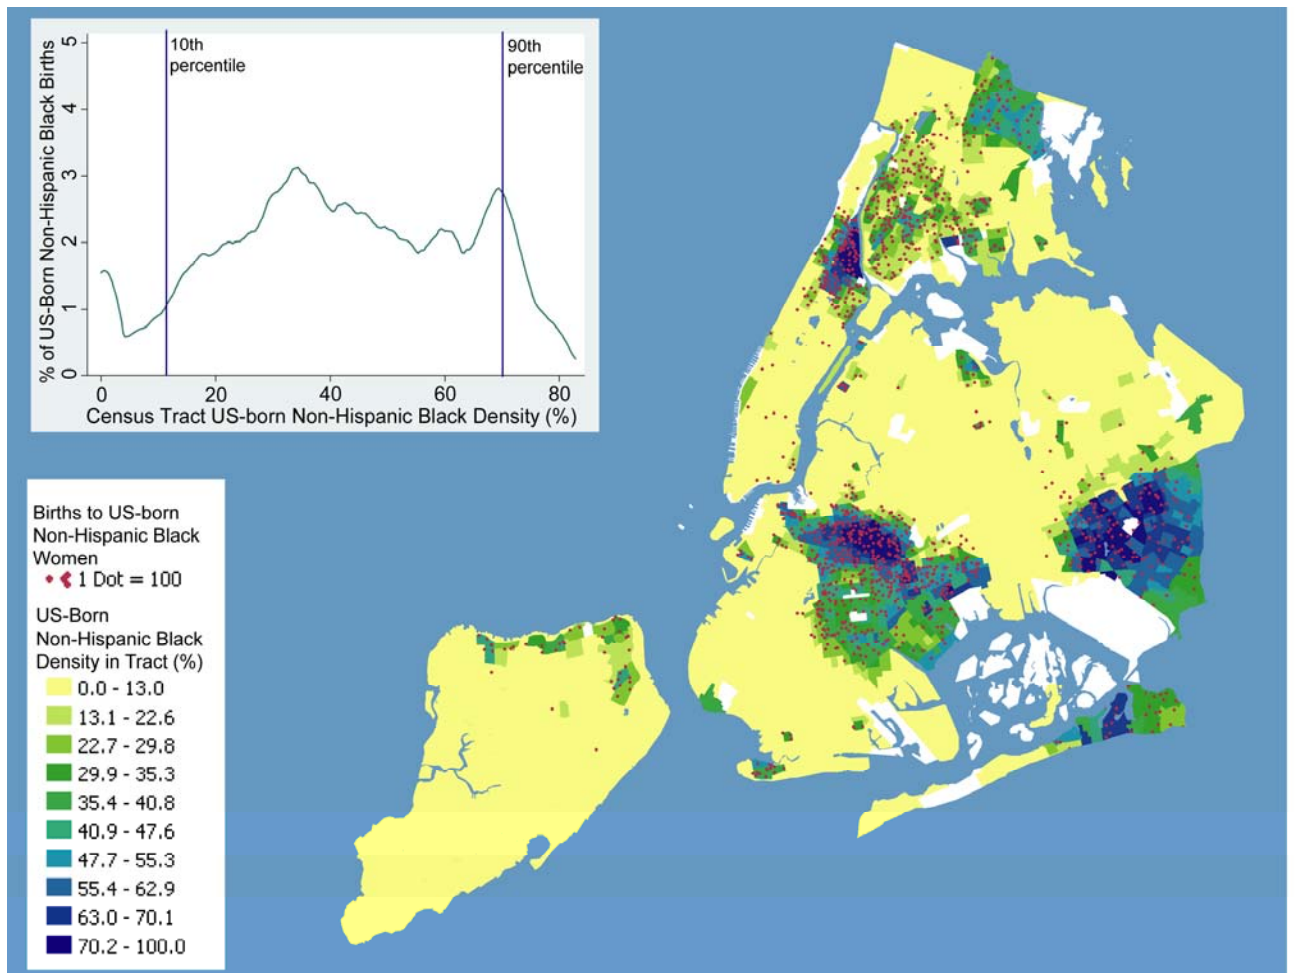

**Web Figure 2.** Preterm Birth Risk Differences<sup>a</sup> for African-, Caribbean-, and US-born Non-Hispanic Black Women Associated With Neighborhoods in the 90<sup>th</sup> Percentile of Ethnic/Immigrant Density Compared to 10<sup>th</sup> Percentile Neighborhoods Using Alternative Model and Variable Specifications: New York City, 1995-2003

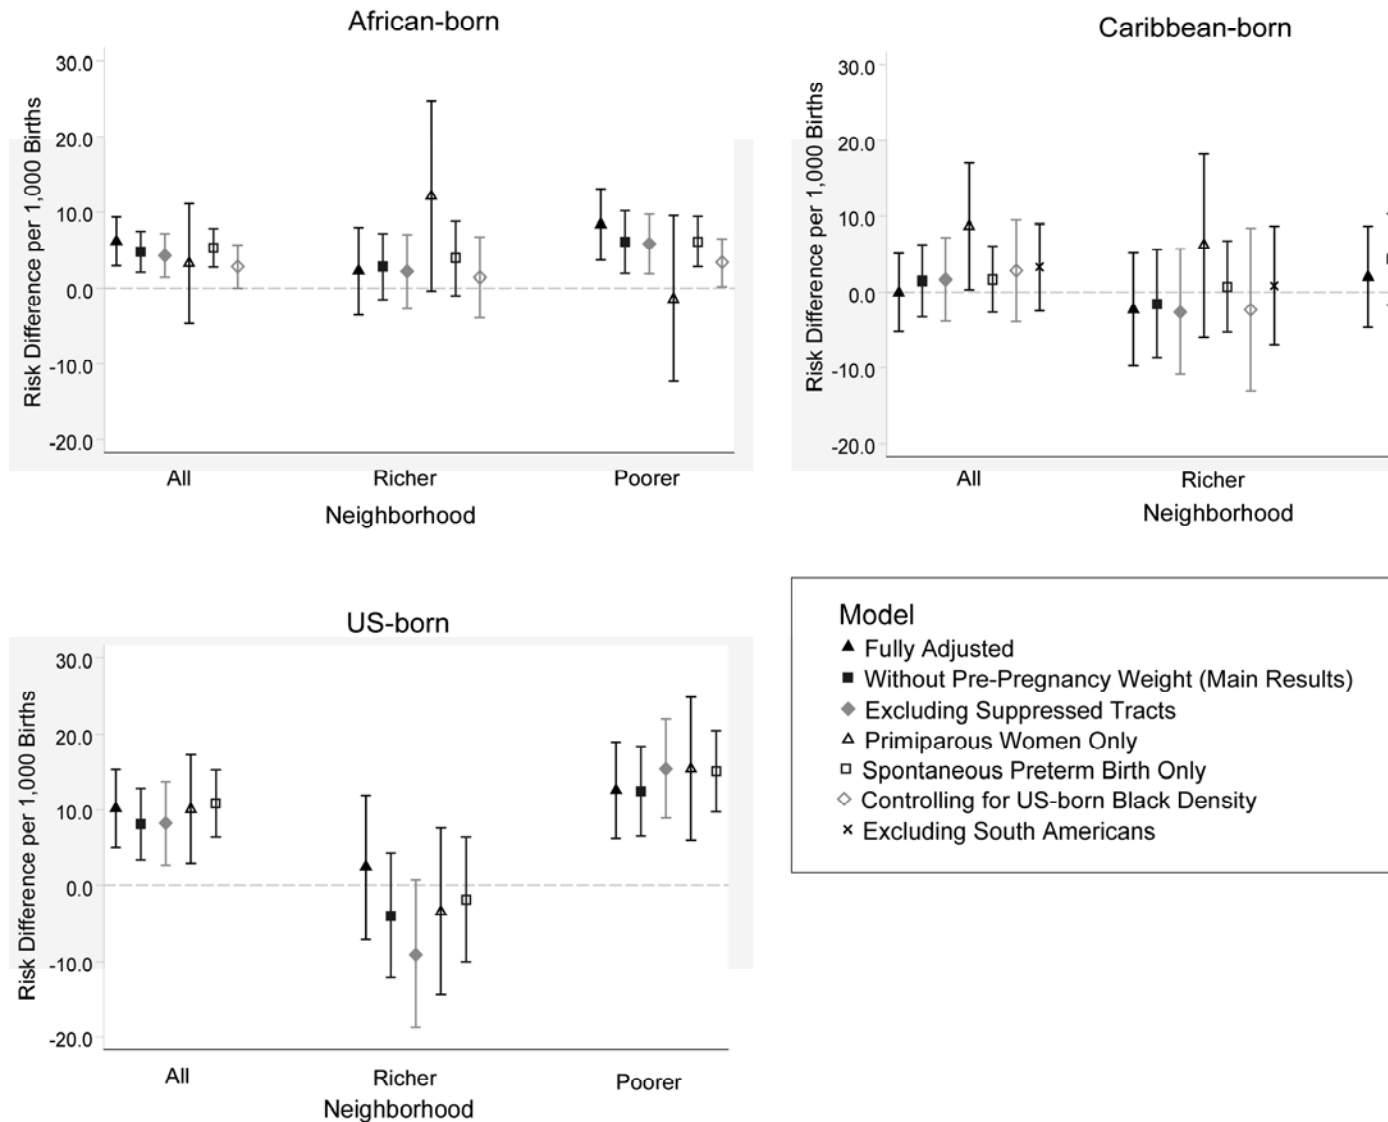

<sup>a</sup>Adjusted and stratified risk differences were calculated for women aged 20-34 who were high school-educated, had 2-5 previous live births, were nonsmokers, were on Medicaid, and resided in a more stable neighborhood. Adjusted risk differences were calculated for poorer neighborhoods; fully-adjusted estimates were calculated for women weighing 125-150 pounds pre-pregnancy.
